# 1           Reprogramming of Human Cells to Pluripotency Induces 2                                    CENP-A Chromatin Depletion

3  
4 Inês Milagre<sup>1,\*</sup>, Carolina Pereira<sup>1</sup>, Raquel Oliveira<sup>1</sup> and Lars E.T. Jansen<sup>1,2\*</sup>

5  
6 <sup>1</sup>*Instituto Gulbenkian de Ciência; Rua da Quinta Grande, 6; 2780-156 Oeiras, Portugal*

7 <sup>2</sup>*Department of Biochemistry, University of Oxford, OX1, 3QU, UK*

8  
9 *\*Corresponding authors: [imilagre@igc.gulbenkian.pt](mailto:imilagre@igc.gulbenkian.pt) and [lars.jansen@bioch.ox.ac.uk](mailto:lars.jansen@bioch.ox.ac.uk)*

## 10 11    Summary

12  
13 Pluripotent stem cells (PSCs) are central to development as they are the  
14 precursors of all cell types in the embryo. Therefore, maintaining a stable  
15 karyotype is essential, both for their physiological role as well as for use in  
16 regenerative medicine. In culture, an estimated 10-30% of PSC lines present  
17 karyotypic abnormalities, but the underlying causes remain unknown. To gain  
18 insight into the mitotic capacity of human embryonic stem cells and induced  
19 pluripotent stem cells, we explore the structure of the centromere and  
20 kinetochore. Centromere function depends on CENP-A nucleosome-defined  
21 chromatin. We show that while PSCs maintain abundant pools of CENP-A, CENP-  
22 C and CENP-T, these essential centromere components are strongly reduced at  
23 stem cell centromeres. Outer kinetochore recruitment is also impaired to a lesser  
24 extent, indicating an overall weaker kinetochore. This impairment is specific for  
25 the kinetochore forming centromere complex while the inner centromere  
26 protein Aurora B remains unaffected. We further show that, similar to  
27 differentiated human cells, CENP-A chromatin assembly in PSCs requires  
28 transition into G1 phase. Finally, reprogramming experiments indicate that  
29 reduction of centromeric CENP-A levels is an early event during  
30 dedifferentiation, coinciding with global chromatin remodelling. Our  
31 characterisation of centromeres in human stem cells drives new hypotheses  
32 including a possible link between impaired centromere function and stem cell  
33 aneuploidies.

## 34 35    Introduction

36 Embryonic stem cells (ESCs) are derived from the inner cell mass and can give  
37 rise to all cell types in the embryo (Thomson et al., 1998). The maintenance of  
38 genome structure and ploidy is key to their ability to generate viable daughter  
39 cells and maintain their differentiation capacity. Despite their extensive  
40 proliferative potential, the mechanics of cell division in these cells are still under  
41 explored. One key component for faithful mitosis is the centromere, a specialized  
42 chromosomal locus that acts as a chromatin-based platform for the assembly of  
43 the kinetochore, composed of microtubule associated-proteins that drive  
44 chromosome segregation (Cheeseman and Desai, 2008). How centromere  
45 structure is maintained and how it is regulated in stem cells is still unknown.  
46 Pluripotent stem cells can be of embryonic origin, however they can also be  
47 generated in culture using ectopic expression of only four transcription factors

48 (Takahashi and Yamanaka, 2006) leading to the formation of induced  
49 pluripotent stem cells (iPSCs). These share various characteristics with ESCs,  
50 such as a truncated cell-cycle (Ghule et al., 2011), comparable cell morphology,  
51 self-renewal capacities, expression of pluripotency associated markers and the  
52 ability to differentiate into derivatives of all three primary germ layers  
53 (Takahashi and Yamanaka, 2006). The generation of iPSCs offers key tissue  
54 engineering opportunities and clinical applications. Additionally, they also  
55 represent a helpful tool in culture to understand how the stem cell state impacts  
56 on basic cell biology such as the mechanics of cell division and the fidelity of  
57 chromosome segregation.

58 Induction of pluripotency in differentiated cells requires the repression of  
59 somatic genes and activation of self-renewal and pluripotency associated genes.  
60 We and others have shown that reprogramming requires striking remodelling of  
61 chromatin modifications, such as global and targeted DNA demethylation at key  
62 regulatory regions (Lee et al., 2014; Milagre et al., 2017), including pluripotency  
63 related enhancers, super-enhancers (Milagre et al., 2017) and histone marks  
64 (Nashun et al., 2015). Specific histone marks, such as H3K4me2 and H3K9me3  
65 are considered barriers to reprogramming as failure to remove or re-distribute  
66 these marks results in the inability of cells to reach pluripotency (Nashun et al.,  
67 2015). The profound remodelling of chromatin structure is what allows cells to  
68 transition from a somatic cell identity to a stable pluripotent cell identity, while  
69 maintaining the same genomic information. It is not clear how this genome-wide  
70 remodelling of the chromatin impacts on the structure and stability of the  
71 epigenetically defined centromere.

72 Both human ESCs and iPSCs appear to have an elevated level of genomic  
73 instability, at least in culture. Two reports have analysed hundreds of ESC and  
74 iPSC lines used in different laboratories worldwide and assessed that at around  
75 10% to as much as 34% of all cell lines have abnormal karyotypes (International  
76 Stem Cell Initiative et al., 2011; Taapken et al., 2011). ESCs have a unique  
77 abbreviated cell cycle with a shortened G1 phase (Becker et al., 2006), and the  
78 rapid proliferation of these cells has been proposed both as a possible cause, but  
79 also as a consequence of these genomic abnormalities (Weissbein et al., 2014).  
80 Further, it has been shown that karyotypically abnormal pluripotent stem cells  
81 (PSCs) present defects in the capacity to differentiate into all cell types of the  
82 organism and display higher neoplastic capacity, thus hindering their potential  
83 application (Zhang et al., 2016). However, why these cells are prone to  
84 karyotypic defects is unclear.

85 Here we explore the structure of the centromere in both embryo-derived stem  
86 cells as well as induced pluripotent stem cells with the aim to understand the  
87 basis of mitotic fidelity and possible causes of aneuploidy. Central to the  
88 structure, function and maintenance of the centromere is an unusual chromatin  
89 domain defined by nucleosomes containing the histone H3 variant CENP-A  
90 (Black et al., 2010; McKinley and Cheeseman, 2016). Centromere specification is  
91 largely uncoupled from DNA cis elements (Marshall et al., 2008; Murillo-Pineda  
92 and Jansen, 2020) and maintenance depends primarily on a self-propagating  
93 CENP-A feedback mechanism (Hori et al., 2013; Mendiburo et al., 2011). We have  
94 previously shown in somatic cells that CENP-A is stably associated with  
95 chromatin throughout the cell cycle, consistent with a role in epigenetically  
96 maintaining centromere position (Bodor et al., 2013; Falk et al., 2015). CENP-A

97 chromatin in turn recruits the constitutive centromere-associated network  
98 (CCAN) (Foltz et al., 2006; Okada et al., 2006). The key components of this  
99 network are CENP-C and CENP-T that make direct contacts to the microtubule  
100 binding kinetochore in mitosis (Gascoigne et al., 2011; Hori et al., 2008). CENP-A  
101 chromatin propagation is cell cycle regulated and restricted to G1 phase, through  
102 inactivation of the cyclin-dependent kinases (Cdk1 and Cdk2) (Silva et al., 2012;  
103 Stankovic et al., 2017). Nascent CENP-A is guided to the centromere by the  
104 HJURP chaperone in a manner dependent on the Mis18 complex (Barnhart et al.,  
105 2011; Dunleavy et al., 2009; Foltz et al., 2009), both of which are under strict cell  
106 cycle control (McKinley and Cheeseman, 2014; Stankovic et al., 2017).  
107 Although the mechanisms of centromere assembly and the cell cycle control  
108 thereof are well established in somatic cells, virtually nothing is known about  
109 centromere regulation in PSCs. Here we define the composition and size of the  
110 human centromere in both ESCs as well as iPSCs and find that stem cells  
111 maintain a reduced centromeric chromatin size, impacting the key centromere  
112 proteins CENP-A, CENP-C and CENP-T, despite ample pools of cellular protein.  
113 This reduction in centromere size is recapitulated by induction of the stem cell  
114 state and coincides with early reprogramming.

115

## 116 Results

### 117 **Pluripotent stem cells have a weaker centromere than differentiated cells**

118 To characterize the mitotic performance of human embryonic stem cells (ESCs)  
119 we cultured the established embryonic stem cell line H9 (hESCs, henceforth) and  
120 determined the fidelity of chromosome segregation. To this end, we fixed and  
121 scored mitotic cells for chromosome segregation errors. We compared  
122 segregation rates to human RPE-1 cells (RPE, henceforth) as a representative  
123 immortalized somatic epithelial cell line. In agreement with previous reports  
124 (International Stem Cell Initiative et al., 2011; Taapken et al., 2011), we find that  
125 cultured human ESCs have a twofold elevation in total chromosome  
126 missegregation events (Figure S1A).

127 To characterize centromere size and function in ESCs we compared centromere  
128 protein levels by immunofluorescence in hESCs cells and RPE cells in which we  
129 have previously characterised centromeres in detail (Bodor et al., 2014).  
130 Furthermore, we reprogrammed human primary fibroblast derived from adult  
131 skin into induced pluripotent stem cells (iPSCs) by Sendai virus-mediated  
132 transduction of the Yamanaka reprogramming factors [Oct4, Sox2, Klf4 and c-  
133 Myc (Takahashi and Yamanaka, 2006)]. We reprogrammed fibroblasts from two  
134 different human donors to iPSCs, which express Sox2 and Nanog, to levels  
135 comparable to hESCs (Figure S1B). CENP-A containing nucleosomes form the  
136 chromatin platform upon which the centromere complex and kinetochore is  
137 build. Despite the essential nature of ESCs to life and development, we find  
138 centromeric chromatin to be greatly reduced in CENP-A nucleosomes numbers,  
139 at ~40% of the levels observed in RPE cells (Figure 1A, B). Next, we determined  
140 whether reduced centromeric chromatin size is unique to hESCs or whether this  
141 is a general phenomenon across stem cells. In agreement with the data derived  
142 from embryonic stem cells, iPSCs also show a dramatic decline of CENP-A levels  
143 at the centromere, to as little as 25% of RPE levels and 29 to 42% of the levels  
144 observed in the donor fibroblasts (donor#2 and donor#1, respectively) from  
145 which the iPSCs were reprogrammed (Figure 1A, B, S1C). This latter result

146 demonstrates that reduced centromeric CENP-A is directly linked to the  
147 epigenetically determined stem cell state as the iPSCs are genetically identical to  
148 their cognate donor fibroblasts. We confirmed these results by cell fractionation  
149 experiments. We observed that hESC have reduced levels of CENP-A in the  
150 chromatin bound fraction with a comparative increase in the soluble fraction,  
151 when compared to RPE cells (Figure S1C). Consistently, the ratio of chromatin  
152 bound to soluble pool of CENP-A, is decreased in hESC (Figure S1D, E).

153 We have previously determined that human RPE cells have 400 molecules of  
154 CENP-A per centromere on average, equating to 200 nucleosomes in interphase  
155 (Bodor et al., 2014). By ratiometric comparison we estimate CENP-A nucleosome  
156 levels at hESCs and the two iPSC lines to be at 80, 70 and 50 nucleosomes per  
157 centromere, respectively.

158 We then determined the impact of the stem cell state on the larger centromere  
159 complex. Two key components of the constitutive centromere-associated  
160 network (CCAN) (Cheeseman and Desai, 2008) that make direct contacts with  
161 the kinetochore in mitosis are CENP-C and CENP-T (Gascoigne et al., 2011; Hori  
162 et al., 2008). Similar to CENP-A we find that both CENP-C and CENP-T levels are  
163 dramatically reduced at stem cell centromeres, both in embryonic-derived as  
164 well as in iPSCs (Figure 1A, B, S1C). Surprisingly, we find that the direct  $\alpha$ -  
165 satellite binding protein CENP-B is also reduced at stem cell centromeres to 34%  
166 of RPE levels. This is unexpected as CENP-B is, at least in principle, driven by  
167 direct DNA sequence contacts (Masumoto et al., 1989).

168 While all centromere components analysed show reduced levels at the  
169 centromere, we find this not to be the case for the inner centromere component,  
170 Aurora B. This essential mitotic kinase (Krenn and Musacchio, 2015) is part of  
171 the chromosome passenger complex, localized to the inner centromere and  
172 important for error correction during mitosis (Carmena et al., 2012). We find  
173 Aurora B to be maintained at levels similar to somatic cells (Figures S1F and  
174 S1G), indicating that the remodelling at the centromere is unique for the  
175 kinetochore forming centromere complex.

176 One possible explanation for reduced centromere occupancy of CENP-A and  
177 CENP-C is that stem cells have reduced expression of centromere protein-  
178 encoding genes. To determine expression levels directly we probed extracts of  
179 RPE, hESCs, iPSCs and their parent cells for centromere protein levels. Despite  
180 reduced centromere occupancy, both embryonic and induced pluripotent stem  
181 cells maintain levels of CENP-A expression, even in excess (up to 2 fold) of those  
182 in fibroblasts, even when compared to genetically identical donor cells of iPSCs  
183 (Figure 2A, B). This is consistent with a previous report that evaluated mRNA  
184 stores of CENP-A in hESCs (Ambartsumyan et al., 2010). This uncoupling  
185 between cellular and centromeric levels in stem cells is also observed for CENP-  
186 C, where protein expression is 2 fold above that of fibroblasts. In contrast, while  
187 CENP-B is expressed in stem cells, the overall levels appear to be lower, possibly  
188 explaining the reduced centromere levels (Figure 2A, B). These results indicate  
189 that despite large pools of available CENP-A and CENP-C, these proteins are not  
190 efficiently assembled at centromeres.

191

### 192 **CENP-A is loaded in G1 phase of the stem cell cycle**

193 In human somatic cells, CENP-A has a unique dynamics along the cell cycle,  
194 where nucleosomes containing CENP-A are efficiently recycled on sister



195 chromatids during S phase (Bodor et al., 2013; Jansen et al., 2007). New  
196 assembly of CENP-A occurs exclusively in early G1 phase in a CDK1 and 2  
197 regulated manner (Jansen et al., 2007; Silva et al., 2012; Stankovic et al., 2017).  
198 Human stem cells have a characteristically abbreviated cell cycle where cells  
199 enter S phase soon after exit from mitosis (Becker et al., 2006). As G1 phase is  
200 short in these cells, CENP-A assembly dynamics could be altered. We determined  
201 the timing of CENP-A assembly using a previously established CENP-A assembly  
202 assay based on SNAP enzyme fluorescent quench-chase-pulse labelling (Bodor et  
203 al., 2012). We established a hESC line in which we introduced a SNAP-tagged  
204 CENP-A transgene by piggybac transposition to avoid gene silencing in stem cells  
205 [(Pannell et al., 2000) see methods]. We then subjected cells to a SNAP quench-  
206 chase-pulse protocol in which only nascent CENP-A-SNAP is visualised (Figure  
207 3A). Cells were co-stained with  $\alpha$ -tubulin to mark microtubules and identify G1  
208 cells, based on the characteristic G1-phase-specific midbody staining. This  
209 analysis revealed that cells in G1 are positive for CENP-A assembly, similar to  
210 control somatic HeLa CENP-A-SNAP cells [Figure 3B and (Jansen et al., 2007;  
211 Silva et al., 2012; Stankovic et al., 2017)]. We therefore conclude that the G1-  
212 phase assembly is preserved in embryonic stem cells.

213

#### 214 **Mild reduction of kinetochore size of PSCs in mitosis**

215 As we find hESCs and iPSCs to maintain a much smaller centromere complex we  
216 determined the consequences for kinetochore size which is the key protein  
217 complex to generate microtubule attachments in mitosis (Cheeseman and Desai,  
218 2008). We stained mitotic cells for CENP-E, a mitotic kinesin, critical for  
219 chromosome congression (Wood et al., 1997). Further, we determined the levels  
220 of HEC1, an essential component of the KMN network of proteins, responsible for  
221 microtubule binding (Cheeseman et al., 2006) (Figure 4A). Both proteins  
222 accumulate on mitotic kinetochores in stem cells. While CCAN levels are low  
223 (Figure 2), both outer kinetochore components analysed are slightly reduced  
224 compared to epithelial RPE cells or donor fibroblasts (Figures 4B, C and S4A, B).  
225 Interestingly, similar to the excess cellular pools of CENP-A and CENP-C, we find  
226 that the modestly reduced kinetochore is not a consequence of a lack of  
227 expression as overall levels of both CENP-E, as well as HEC1, are higher in stem  
228 cells and iPSCs compared to RPE or fibroblasts (Figures 4D, E and S4 C, D).

229

#### 230 **CENP-A loss is induced during early reprogramming of fibroblasts to iPSCs**

231 The ability to induce the stem cell state in somatic cells offers a unique  
232 opportunity to determine the dynamics of centromeric chromatin organization  
233 and how this is linked to the formation of stem cells. The comparison of CENP-A  
234 chromatin in iPSCs and their cognate donor cells suggest that CENP-A loss is an  
235 epigenetic event that occurs during reprogramming of otherwise genetically  
236 identical cells. To determine when during the reprogramming process CENP-A loss  
237 occurs we transduced fibroblasts with a cocktail of Sendai viruses expressing the  
238 four Yamanaka factors to induce pluripotency (Figure 5A). Complete iPSC  
239 formation typically requires 30 days of culturing followed by clone isolation at  
240 40-60 days (Figure 5A). Here, we focused on very early signs of reprogramming  
241 based on the expression of the pluripotency marker SSEA-4, which becomes  
242 expressed early during dedifferentiation (Chan et al., 2009). Fibroblasts do not  
243 express this cell surface protein, however they express CD13 (which is not

244 expressed in PSCs). Taking advantage of this, we used Fluorescence-Activated  
245 Cell Sorting (FACS) to isolate SSEA-4 negative/CD13 positive (refractory to  
246 reprogramming) or SSEA-4 positive/CD13 negative (prone to reprogram) cells  
247 as early as 9 and 11 days post transduction of reprogramming factors (Figure  
248 5A). These cells were stained for CENP-A, CENP-B and CENP-C to determine  
249 centromeric levels of the CCAN. We find that as early as 9 days, the first time  
250 point at which we can isolate a significant amount of SSEA-4 positive/CD13  
251 negative cells, CENP-A levels show signs of decline which become more evident  
252 at 11 days post transduction (Figure 5B,C). CENP-B and to a lesser extent CENP-C  
253 levels also follow this pattern of recruitment to the centromere, with CENP-B  
254 levels decreasing as early as day 9 of reprogramming (Figure S5A, B).  
255 These results indicate that the reorganization of centromeres is tightly linked to  
256 the stem cell state and correlates with early reprogramming events.  
257

## 258 Discussion

259 The centromere is an essential chromosomal locus to drive chromosome  
260 segregation. While its structure and function has been studied in considerable  
261 detail in somatic, differentiated cells of different organisms, e.g. cancer cells,  
262 immortalized cells and primary cells in humans, Chicken DT40 lymphocytes and  
263 Drosophila tissue culture cells (Fukagawa and Earnshaw, 2014; McKinley and  
264 Cheeseman, 2016), relatively little is known about centromere structure in stem  
265 cell populations. Aspects of centromere biology have been reported in stem cells  
266 of the Arabidopsis meristem and Drosophila midgut and male germline (García  
267 Del Arco et al., 2018; Lermontova et al., 2006; Ranjan et al., 2018) but  
268 centromere structure and size has not been thoroughly investigated in those  
269 systems.

270 Using human embryonic stem cells and iPSCs as a model we found that these  
271 cells maintain a low level of centromeric chromatin as well as associated  
272 centromere proteins, despite abundant cellular pools. Interestingly, the inner  
273 centromere component Aurora B is maintained at normal levels and does not  
274 seem affected in PSCs. Moreover, we find that the weak centromere seems to  
275 only moderately affect the recruitment of kinetochore proteins in mitosis. These  
276 findings indicate that CCAN size and kinetochore size regulation can be  
277 uncoupled, and that stem cells have the ability to partially, but not fully,  
278 compensate for the reduced centromeric chromatin size. Although this does not  
279 seem to be a conserved characteristic of the centromere (Drpic et al., 2018), we  
280 previously showed this to be the case in RPE cells in which forced reduction or  
281 expansion of CENP-A chromatin had little impact on kinetochore size (Bodor et  
282 al., 2014). We now find a physiological example of a partial compensatory  
283 mechanism within the kinetochore.

284 It has previously been shown that, in Drosophila, CENP-A assembles in  
285 telophase/early G1 in brain stem cells (Dunleavy et al., 2012). An increase in  
286 CENP-A in G2 in germline stem cells has also been suggested recently (Ranjan et  
287 al., 2019). Here we show that assembly of CENP-A chromatin occurs in G1 phase  
288 of the stem cell cycle, as is the case in human differentiated and immortalized

289 cells and in cancer cell lines (Jansen et al., 2007; Silva et al., 2012). An open  
290 question remains how CENP-A levels are restricted in stem cells. One possibility  
291 is that cells that exit mitosis and rapidly transition into S phase have a relatively  
292 short G1 phase window during which CENP-A can be assembled before  
293 inhibitory Cdk activity rises (Silva et al., 2012). It is tempting to speculate that  
294 this combined with the lack of CENP-B could lead to the destabilisation of CENP-  
295 A and CENP-C (Fachinetti et al., 2015), resulting in a weaker centromere in PSCs.

296 We further find that reduction in centromeric chromatin size is induced early  
297 during iPSC reprogramming, coincident with the time of cell cycle shortening.  
298 Profound remodelling of chromatin marks is observed during reprogramming  
299 and one of the earliest events in reprogramming is the rapid genome-wide re-  
300 distribution of H3K4me2 during both mouse and human somatic cell  
301 reprogramming (Cacchiarelli et al., 2015; Koche et al., 2011). Moreover,  
302 methylation of H3K4me2 by Wdr5 to a trimethylated state, leading to a global  
303 decrease in di-methylation, is required for both self-renewal and efficient  
304 reprogramming of somatic cells (Ang et al., 2011). H3K4me2 depletion at  
305 engineered centromeric chromatin causes defects in HJURP recruitment and  
306 CENP-A assembly and consequent kinetochore dysfunction and chromosome  
307 missegregation (Bergmann et al., 2011). These and other major chromatin  
308 changes that also occur during this early window, including DNA methylation  
309 erasure, could play a role in CENP-A chromatin remodelling.

310 Finally, cultured stem cells are prone to chromosome missegregation compared  
311 to somatic cells. While this can be a consequence, at least in part, of cell culture  
312 conditions, our findings that stem cells maintain a reduced centromere complex,  
313 may impact on chromosome segregation fidelity. It will be interesting to  
314 establish whether there is a causal link in stem cell centromere functionality and  
315 the tendency of these cells to missegregate.

## 316 Methods

317

### 318 Cell culture

319 All cell lines were grown at 37°C in 5% CO<sub>2</sub> incubators. Normal human dermal  
320 fibroblasts (NHDF - GIBCO) were maintained in fibroblast medium (DMEM high  
321 glucose, 10% FBS, 1% Pen-Strep, 1% MEM Non-Essential Amino Acids and 50  
322 µM 2-mercaptoethanol). H9 ESC (hESC) and hiPSC lines were grown in VTN  
323 coated plates in Essential-8 medium (TeSR-E8, Stem Cell Technologies), and  
324 dissociated with gentle cell dissociation reagent (0.5mM EDTA in PBS) or Tryple-  
325 Express Enzyme (Gibco) when single cell dissociation was necessary. RPE-1 cells  
326 were grown in RPE medium (DMEM/F-12, 10%FBS, 1% Pen-Strep, 2mM L-  
327 Glutamine, 1.6% Sodium bicarbonate). HeLa-CENP-A SNAP clone #72 (Jansen et  
328 al., 2007) was grown in HeLa medium (DMEM high glucose, 10% FBS, 1% Pen-  
329 Strep, 2mM L- Glutamine).

330

### 331 Reprogramming of human Fibroblasts to iPSCs

332 Reprogramming was performed as described previously (Milagre et al., 2017).  
333 Briefly, 3.0x10<sup>5</sup> NHDFs were transduced with CytoTune®-iPS 2.0 Sendai

334 Reprogramming Kit (Invitrogen), according to manufacturer's instruction, at an  
335 MOI of 1. Cells were maintained in fibroblast medium (DMEM, 10% FBS, 1% Pen-  
336 Strep, 1% MEM Non-Essential Amino Acids and 50  $\mu$ M 2-mercaptoethanol) for  
337 five days. Transduced cells were then replated onto VTN (Invitrogen) coated  
338 dishes and maintained in Essential 8 medium (E8 - stem cell technologies).  
339 Medium was replenished daily. Cells were collected at different time-points  
340 during reprogramming by FACS (d9, d11) or manually (NHDFs and fully  
341 established iPSCs).

342

### 343 **Immunofluorescence, microscopy and image analysis**

344 Cells were grown on glass coverslips coated with poly-L lysine (Sigma-Aldrich)  
345 or VTN (Thermo Fischer Scientific) and fixed with 4% formaldehyde (Thermo  
346 Scientific) for 10 min followed by quenching with 100mM Tris-HCl. Cells were  
347 permeabilised in PBS with 0.3% Triton-X-100. All primary antibody incubations  
348 were performed at 37°C for 1h in a humid chamber. Fluorescent secondary  
349 antibodies were from Jackson ImmunoResearch (West Grove, PA) or Rockland  
350 ImmunoChemicals (Limerick, PA) and used at a dilution of 1:250. All secondary  
351 antibody incubations were performed at 37°C for 45 min in a humid chamber.  
352 Cells were counter-stained with DAPI (4',6-diamidino-2-phenylindole; Sigma-  
353 Aldrich) before mounting in Mowiol.

354 The following primary antibodies and dilutions were used: mouse monoclonal  
355 anti-CENPA (#ab13939, abcam) at 1:500, rabbit polyclonal anti-CENP-B  
356 (#ab25734, Abcam) at 1:500, guinea-pig polyclonal anti-CENP-C (#PD030, MBL  
357 International) at 1:1000, rabbit polyclonal anti-CENP-T at 1:250 (#ab220280,  
358 Abcam), goat anti-Sox2 (#AF2018, R&D) at 1:200, goat anti-Nanog (#AF1997,  
359 R&D) at 1:100, rabbit anti-CENP-E (kind gift from Don Cleveland) at 1:200,  
360 mouse monoclonal anti-Aurora B (#611082, BD Transduction Laboratories) at  
361 1:200, mouse monoclonal anti-HEC1 (Thermo Scientific Pierce MA1-23308) at  
362 1:100 and rat monoclonal anti-Tubulin (SC-53029, Santa Cruz Biotechnology,  
363 Dallas, TX) at 1:10,000.

364 Z-stack slices were captured with wide field microscopes, either Leica High  
365 Content Screening microscope, based on Leica DMI6000 equipped with a  
366 Hamamatsu Flash Orca 4.0 sCMOS camera, using a 63x oil objective (HC PLAN  
367 APO, NA 1.4) with 0.2  $\mu$ m z sections, or Deltavision Core system (Applied  
368 Precision) inverted microscope (Olympus, IX-71) coupled to Cascade2 EMCCD  
369 camera (Photometrics), using a 60x oil objective (Plan Apo N, NA 1.42) with 0.2  
370  $\mu$ m z sections.

371 Immunofluorescent signals were quantified using the CRaQ (Centromere  
372 Recognition and Quantification) method (Bodor et al., 2012) using CENP-A,  
373 CENP-T or CENP-C as centromeric reference. Alternatively, Hec1 and CENP-E  
374 levels were measured only in mitotic cells using an ImageJ based macro, which  
375 measures the median intensity of the whole nucleus.

376

### 377 **Western blot (WB) analysis**

378 For WB analysis, whole cell extracts were resolved by SDS-PAGE and blotted  
379 onto Nitrocellulose membranes. Membranes were blocked in TBS-Tween (10%  
380 powdered milk) or Odyssey blocking buffer (Li-cor Biosciences) and incubated  
381 overnight at 4°C with the indicated antibodies. Secondary antibodies were used

382 at 1:10000 prior to detection on Odyssey near-infrared scanner (Li-cor  
383 Biosciences).

384 The following primary antibodies were used for WB: rabbit polyclonal anti-  
385 CENP-A (#2186, Cell Signaling Technology) at 1:500, rabbit polyclonal anti-  
386 CENP-B (#ab25734, Abcam) at 1:200, rabbit polyclonal anti-CENP-T  
387 (#ab220280, Abcam) at 1:250, guinea-pig polyclonal anti-CENP-C (#PD030, MBL  
388 International) at 1:250, rabbit polyclonal anti-H4K20me (#ab9052, Abcam) at  
389 1:4000, rabbit anti-CENP-E (kind gift from Don Cleveland) 1:250, mouse  
390 monoclonal anti-Hec1 (#MA1-23308, Thermo Fischer Scientific) at 1:250, mouse  
391 monoclonal anti- $\alpha$  tubulin (T9026, Sigma-Aldrich) at 1:5000, rabbit monoclonal  
392 anti-GAPDH (#2118S, Cell Signaling) at 1:2000. Secondary antibodies used:  
393 IRDye800CW anti-rabbit (Li-cor Biosciences), IRDyLight800CW anti-rabbit (Li-  
394 cor Biosciences), IRDyLight800CW anti-guinea (Li-cor Biosciences),  
395 IRDyLight800CW anti-mouse (Li-cor Biosciences) and IRDyLight680LT anti-  
396 mouse (Li-cor Biosciences).

397

### 398 **Cell Fractionation**

399 Cell fractionation was performed for RPE and hESC lines after cell lysis in ice cold  
400 buffer [50 mM Tris-HCl (pH 7.5), 150 mM NaCl, 0.5 mM EDTA, 1% Triton-X 100,  
401 and a protease inhibitor cocktail (ROCHE)]. Soluble proteins were separated  
402 from the insoluble fraction by centrifugation at 21,000 $\times$ g at 4°C and resuspended  
403 in an equal volumes of lysis buffer. Pellet fraction was incubated with 1.25 U/ $\mu$ l  
404 of benzonase nuclease (Merck, Millipore, Burlington, MA) on ice for 10 min prior  
405 to denaturation in 4X loading buffer (Li-Cor).

406

### 407 **DNA constructs**

408 To obtain the hESC CENP-A-SNAP cell line we re-cloned CENP-A-SNAP, from  
409 pBABE-CENP-A SNAP plasmid (Jansen et al., 2007), to avoid retroviral silencing,  
410 onto a piggybac plasmid (pB-CAG-Dest-pA-pgk-bsd - kind gift from José Silva).

411

### 412 **Stable cell lines**

413 hESC H9 cell line was transfected with 2 $\mu$ g of pB-CAG-Dest-pA-pgk-bsd-CENP-A-  
414 SNAP plus 2 $\mu$ g of pBASE plasmid (harbouring the piggybac transposase, kind gift  
415 from José Silva) using FuGeneHD (Roche), in a ratio of DNA:FuGene of 1:3. Cells  
416 were then subjected to 5 days blasticidin selection and single clones were picked  
417 and characterised for CENP-A-SNAP protein levels by western blot.

418

### 419 **Quench-chase-pulse labelling**

420 Cell lines expressing CENP-A-SNAP were quench-pulse labelled as previously  
421 described (Bodor et al., 2012). Briefly, cells were quenched with a non-  
422 fluorescent bromothenylpteridine (BTP; New England Biolabs) at 2  $\mu$ M final  
423 concentration, and kept in culture for 5 hours and 30 minutes. Cells were then  
424 pulse labelled with tetra-methyl-rhodamine-conjugated SNAP substrate (TMR-  
425 Star; New England Biolabs) at 4  $\mu$ M final concentration, labelling all newly  
426 synthesised CENP-A molecules at the centromere, and fixed for  
427 immunofluorescence.

428

### 429 **Fluorescence-activated cell sorting (FACS)**

430 For cell sorting, cells undergoing reprogramming were incubated with  
431 antibodies against CD13 (PE, BD Pharmigen) and SSEA-4 (Alexa Fluor 647, BD  
432 Pharmigen) for 30 min. Cells were washed in a 2% FBS/PBS solution and passed  
433 through a 50µm cell strainer to obtain a single-cell suspension.  
434 Appropriate negative and positive controls were used to assess optimal FACS  
435 conditions. Cell sorting was performed using a FACS Aria cell sorter instrument  
436 (BD Biosciences) and cells were collected for immunofluorescence.  
437

#### 438 Author Contributions

439 I.M. conceived the project, designed and performed experiments, analysed data,  
440 and wrote the manuscript; C.P. performed western blot and cell fractionation  
441 experiments, R.A.O and L.J. interpreted the data, provided helpful discussions for  
442 project design and wrote the manuscript. All authors have interpreted the data  
443 and provided helpful discussions, read and approved the manuscript.  
444

#### 445 Acknowledgements

446  
447 We thank Don W. Cleveland (UCSD) for CENP-E antibodies, Jose Silva for the pB-  
448 CAG-Dest-pA-pgk-bsd and pBASE plasmids and João Mata (IGC) for technical  
449 support. We would like to thank the members of the Jansen and Oliveira Labs for  
450 helpful discussions. We would like to thank the technical support of IGC's  
451 Advanced Imaging Facility (AIF-UIC), which is supported by the national  
452 Portuguese funding ref# PPBI-POCI-01-0145-FEDER-022122, co-financed by  
453 Lisboa Regional Operational Programme (Lisboa 2020), under the Portugal 2020  
454 Partnership Agreement, through the European Regional Development Fund  
455 (FEDER) and Fundação para a Ciência e a Tecnologia (FCT; Portugal). We would  
456 like to thank the Flow Cytometry Facility of Instituto Gulbenkian de Ciência for  
457 their services and assistance. This work was funded by Fundação para a Ciência  
458 e Tecnologia project: PTDC/BIA-CEL/31502/2017 and was supported by the  
459 European Union's Horizon 2020 research and innovation programme under the  
460 Marie Skłodowska-Curie grant agreement No 704763 to (Marie Skłodowska-  
461 Curie fellowship to IM) as well as funding from an ERC-consolidator grant ERC-  
462 2013-CoG-615638 and a Wellcome Senior Research Fellowship in Basic  
463 Biomedical Science to LETJ and EMBO Installation Grant IG2778 to RAO.  
464

#### 465 References

- 466 Ambartsumyan, G., Gill, R.K., Perez, S.D., Conway, D., Vincent, J., Dalal, Y., and Clark, A.T.  
467 (2010). Centromere protein A dynamics in human pluripotent stem cell self-renewal,  
468 differentiation and DNA damage. *Hum Mol Genet* *19*, 3970–3982.
- 469 Ang, Y.-S., Tsai, S.-Y., Lee, D.-F., Monk, J., Su, J., Ratnakumar, K., Ding, J., Ge, Y., Darr, H.,  
470 Chang, B., et al. (2011). Wdr5 mediates self-renewal and reprogramming via the  
471 embryonic stem cell core transcriptional network. *Cell* *145*, 183–197.
- 472 Barnhart, M.C., Kuich, P.H.J.L., Stellfox, M.E., Ward, J.A., Bassett, E.A., Black, B.E., and Foltz,  
473 D.R. (2011). HJURP is a CENP-A chromatin assembly factor sufficient to form a  
474 functional de novo kinetochore. *J Cell Biol* *194*, 229–243.

- 475 Becker, K.A., Ghule, P.N., Therrien, J.A., Lian, J.B., Stein, J.L., van Wijnen, A.J., and Stein, G.S.  
476 (2006). Self-renewal of human embryonic stem cells is supported by a shortened G1 cell  
477 cycle phase. *J. Cell. Physiol.* *209*, 883–893.
- 478 Bergmann, J.H., Rodríguez, M.G., Martins, N.M.C., Kimura, H., Kelly, D.A., Masumoto, H.,  
479 Larionov, V., Jansen, L.E.T., and Earnshaw, W.C. (2011). Epigenetic engineering shows  
480 H3K4me2 is required for HJURP targeting and CENP-A assembly on a synthetic human  
481 kinetochore. *EMBO J* *30*, 328–340.
- 482 Black, B.E., Jansen, L.E.T., Foltz, D.R., and Cleveland, D.W. (2010). Centromere identity,  
483 function, and epigenetic propagation across cell divisions. *Cold Spring Harbor Symposia*  
484 *on Quantitative Biology* *75*, 403–418.
- 485 Bodor, D.L., Rodríguez, M.G., Moreno, N., and Jansen, L.E.T. (2012). Analysis of protein  
486 turnover by quantitative SNAP-based pulse-chase imaging. *Current Protocols in Cell*  
487 *Biology / Editorial Board, Juan S. Bonifacino ... [et Al.] Chapter 8*, Unit8.8.
- 488 Bodor, D.L., Valente, L.P., Mata, J.F., Black, B.E., and Jansen, L.E.T. (2013). Assembly in G1  
489 phase and long-term stability are unique intrinsic features of CENP-A nucleosomes.  
490 *Molecular Biology of the Cell* *24*, 923–932.
- 491 Bodor, D.L., Mata, J.F., Sergeev, M., David, A.F., Salimian, K.J., Panchenko, T., Cleveland,  
492 D.W., Black, B.E., Shah, J.V., and Jansen, L.E. (2014). The quantitative architecture of  
493 centromeric chromatin. *ELife* *3*, e02137.
- 494 Cacchiarelli, D., Trapnell, C., Ziller, M.J., Soumillon, M., Cesana, M., Karnik, R., Donaghey, J.,  
495 Smith, Z.D., Ratanasirintraooot, S., Zhang, X., et al. (2015). Integrative Analyses of  
496 Human Reprogramming Reveal Dynamic Nature of Induced Pluripotency. *Cell* *162*, 412–  
497 424.
- 498 Carmena, M., Wheelock, M., Funabiki, H., and Earnshaw, W.C. (2012). The chromosomal  
499 passenger complex (CPC): from easy rider to the godfather of mitosis. *Nat. Rev. Mol. Cell*  
500 *Biol.* *13*, 789–803.
- 501 Chan, E.M., Ratanasirintraooot, S., Park, I.-H., Manos, P.D., Loh, Y.-H., Huo, H., Miller, J.D.,  
502 Hartung, O., Rho, J., Ince, T.A., et al. (2009). Live cell imaging distinguishes bona fide  
503 human iPS cells from partially reprogrammed cells. *Nat. Biotechnol.* *27*, 1033–1037.
- 504 Cheeseman, I.M., and Desai, A. (2008). Molecular architecture of the kinetochore–  
505 microtubule interface. *Nature Reviews Molecular Cell Biology* *9*, 33–46.
- 506 Cheeseman, I.M., Chappie, J.S., Wilson-Kubalek, E.M., and Desai, A. (2006). The conserved  
507 KMN network constitutes the core microtubule-binding site of the kinetochore. *Cell* *127*,  
508 983–997.
- 509 Drpic, D., Almeida, A.C., Aguiar, P., Renda, F., Damas, J., Lewin, H.A., Larkin, D.M.,  
510 Khodjakov, A., and Maiato, H. (2018). Chromosome Segregation Is Biased by  
511 Kinetochore Size. *Curr. Biol.* *28*, 1344–1356.e5.
- 512 Dunleavy, E.M., Roche, D., Tagami, H., Lacoste, N., Ray-Gallet, D., Nakamura, Y., Daigo, Y.,  
513 Nakatani, Y., and Almouzni-Pettinotti, G. (2009). HJURP is a cell-cycle-dependent  
514 maintenance and deposition factor of CENP-A at centromeres. *Cell* *137*, 485–497.

- 515 Dunleavy, E.M., Beier, N.L., Gorgescu, W., Tang, J., Costes, S.V., and Karpen, G.H. (2012).  
516 The cell cycle timing of centromeric chromatin assembly in *Drosophila* meiosis is  
517 distinct from mitosis yet requires CAL1 and CENP-C. *PLoS Biol* 10, e1001460.
- 518 Fachinetti, D., Han, J.S., McMahon, M.A., Ly, P., Abdullah, A., Wong, A.J., and Cleveland,  
519 D.W. (2015). DNA Sequence-Specific Binding of CENP-B Enhances the Fidelity of Human  
520 Centromere Function. *Dev Cell* 33, 314–327.
- 521 Falk, S.J., Guo, L.Y., Sekulic, N., Smoak, E.M., Mani, T., Logsdon, G.A., Gupta, K., Jansen,  
522 L.E.T., Van Duyne, G.D., Vinogradov, S.A., et al. (2015). Chromosomes. CENP-C reshapes  
523 and stabilizes CENP-A nucleosomes at the centromere. *Science* 348, 699–703.
- 524 Foltz, D.R., Jansen, L.E.T., Black, B.E., Bailey, A.O., Yates, J.R., and Cleveland, D.W. (2006).  
525 The human CENP-A centromeric nucleosome-associated complex. *Nature Cell Biology* 8,  
526 458–469.
- 527 Foltz, D.R., Jansen, L.E.T., Bailey, A.O., Yates, J.R., Bassett, E.A., Wood, S., Black, B.E., and  
528 Cleveland, D.W. (2009). Centromere-specific assembly of CENP-a nucleosomes is  
529 mediated by HJURP. *Cell* 137, 472–484.
- 530 Fukagawa, T., and Earnshaw, W.C. (2014). The centromere: chromatin foundation for  
531 the kinetochore machinery. *Dev Cell* 30, 496–508.
- 532 García Del Arco, A., Edgar, B.A., and Erhardt, S. (2018). In Vivo Analysis of Centromeric  
533 Proteins Reveals a Stem Cell-Specific Asymmetry and an Essential Role in Differentiated,  
534 Non-proliferating Cells. *Cell Rep* 22, 1982–1993.
- 535 Gascoigne, K.E., Takeuchi, K., Suzuki, A., Hori, T., Fukagawa, T., and Cheeseman, I.M.  
536 (2011). Induced ectopic kinetochore assembly bypasses the requirement for CENP-A  
537 nucleosomes. *Cell* 145, 410–422.
- 538 Ghule, P.N., Medina, R., Lengner, C.J., Mandeville, M., Qiao, M., Dominski, Z., Lian, J.B.,  
539 Stein, J.L., van Wijnen, A.J., and Stein, G.S. (2011). Reprogramming the pluripotent cell  
540 cycle: restoration of an abbreviated G1 phase in human induced pluripotent stem (iPS)  
541 cells. *J. Cell. Physiol.* 226, 1149–1156.
- 542 Hori, T., Amano, M., Suzuki, A., Backer, C.B., Welburn, J.P., Dong, Y., McEwen, B.F., Shang,  
543 W.-H., Suzuki, E., Okawa, K., et al. (2008). CCAN makes multiple contacts with  
544 centromeric DNA to provide distinct pathways to the outer kinetochore. *Cell* 135, 1039–  
545 1052.
- 546 Hori, T., Shang, W.-H., Takeuchi, K., and Fukagawa, T. (2013). The CCAN recruits CENP-A  
547 to the centromere and forms the structural core for kinetochore assembly. *J Cell Biol*  
548 200, 45–60.
- 549 International Stem Cell Initiative, Amps, K., Andrews, P.W., Anyfantis, G., Armstrong, L.,  
550 Avery, S., Baharvand, H., Baker, J., Baker, D., Munoz, M.B., et al. (2011). Screening  
551 ethnically diverse human embryonic stem cells identifies a chromosome 20 minimal  
552 amplicon conferring growth advantage. *Nat. Biotechnol.* 29, 1132–1144.
- 553 Jansen, L.E.T., Black, B.E., Foltz, D.R., and Cleveland, D.W. (2007). Propagation of  
554 centromeric chromatin requires exit from mitosis. *J Cell Biol* 176, 795–805.



- 555 Koche, R.P., Smith, Z.D., Adli, M., Gu, H., Ku, M., Gnirke, A., Bernstein, B.E., and Meissner,  
556 A. (2011). Reprogramming factor expression initiates widespread targeted chromatin  
557 remodeling. *Cell Stem Cell* 8, 96–105.
- 558 Krenn, V., and Musacchio, A. (2015). The Aurora B Kinase in Chromosome Bi-Orientation  
559 and Spindle Checkpoint Signaling. *Front Oncol* 5, 225.
- 560 Lee, D.-S., Shin, J.-Y., Tonge, P.D., Puri, M.C., Lee, S., Park, H., Lee, W.-C., Hussein, S.M.I.,  
561 Bleazard, T., Yun, J.-Y., et al. (2014). An epigenomic roadmap to induced pluripotency  
562 reveals DNA methylation as a reprogramming modulator. *Nat Commun* 5, 5619.
- 563 Lermontova, I., Schubert, V., Fuchs, J., Klatter, S., Macas, J., and Schubert, I. (2006).  
564 Loading of Arabidopsis centromeric histone CENH3 occurs mainly during G2 and  
565 requires the presence of the histone fold domain. *Plant Cell* 18, 2443–2451.
- 566 Marshall, O.J., Chueh, A.C., Wong, L.H., and Choo, K.H.A. (2008). Neocentromeres: new  
567 insights into centromere structure, disease development, and karyotype evolution. *Am J*  
568 *Hum Genet* 82, 261–282.
- 569 Masumoto, H., Masukata, H., Muro, Y., Nozaki, N., and Okazaki, T. (1989). A human  
570 centromere antigen (CENP-B) interacts with a short specific sequence in alphoid DNA, a  
571 human centromeric satellite. *J Cell Biol* 109, 1963–1973.
- 572 McKinley, K.L., and Cheeseman, I.M. (2014). Polo-like kinase 1 licenses CENP-A  
573 deposition at centromeres. *Cell* 158, 397–411.
- 574 McKinley, K.L., and Cheeseman, I.M. (2016). The molecular basis for centromere identity  
575 and function. *Nat Rev Mol Cell Biol* 17, 16–29.
- 576 Mendiburo, M.J., Padeken, J., Fülöp, S., Schepers, A., and Heun, P. (2011). *Drosophila*  
577 CENH3 is sufficient for centromere formation. *Science* 334, 686–690.
- 578 Milagre, I., Stubbs, T.M., King, M.R., Spindel, J., Santos, F., Krueger, F., Bachman, M.,  
579 Segonds-Pichon, A., Balasubramanian, S., Andrews, S.R., et al. (2017). Gender Differences  
580 in Global but Not Targeted Demethylation in iPSC Reprogramming. *Cell Rep* 18, 1079–  
581 1089.
- 582 Murillo-Pineda, M., and Jansen, L.E.T. (2020). Genetics, epigenetics and back again:  
583 Lessons learned from neocentromeres. *Experimental Cell Research* 111909.
- 584 Nashun, B., Hill, P.W.S., and Hajkova, P. (2015). Reprogramming of cell fate: epigenetic  
585 memory and the erasure of memories past. *EMBO J.* 34, 1296–1308.
- 586 Okada, M., Cheeseman, I.M., Hori, T., Okawa, K., McLeod, I.X., Yates, J.R., Desai, A., and  
587 Fukagawa, T. (2006). The CENP-H-I complex is required for the efficient incorporation  
588 of newly synthesized CENP-A into centromeres. *Nat Cell Biol* 8, 446–457.
- 589 Pannell, D., Osborne, C.S., Yao, S., Sukonnik, T., Pasceri, P., Karaiskakis, A., Okano, M., Li,  
590 E., Lipshitz, H.D., and Ellis, J. (2000). Retrovirus vector silencing is de novo methylase  
591 independent and marked by a repressive histone code. *EMBO J.* 19, 5884–5894.
- 592 Ranjan, R., Snedeker, J., and Chen, X. (2019). Asymmetric Centromeres Differentially  
593 Coordinate with Mitotic Machinery to Ensure Biased Sister Chromatid Segregation in  
594 Germline Stem Cells. *Cell Stem Cell* 25, 666–681.

- 595 Silva, M.C.C., Bodor, D.L., Stellfox, M.E., Martins, N.M.C., Hohegger, H., Foltz, D.R., and  
596 Jansen, L.E.T. (2012). Cdk activity couples epigenetic centromere inheritance to cell  
597 cycle progression. *Developmental Cell* 22, 52–63.
- 598 Stankovic, A., Guo, L.Y., Mata, J.F., Bodor, D.L., Cao, X.-J., Bailey, A.O., Shabanowitz, J., Hunt,  
599 D.F., Garcia, B.A., Black, B.E., et al. (2017). A Dual Inhibitory Mechanism Sufficient to  
600 Maintain Cell-Cycle-Restricted CENP-A Assembly. *Molecular Cell* 65, 231–246.
- 601 Taapken, S.M., Nisler, B.S., Newton, M.A., Sampsell-Barron, T.L., Leonhard, K.A., McIntire,  
602 E.M., and Montgomery, K.D. (2011). Karyotypic abnormalities in human induced  
603 pluripotent stem cells and embryonic stem cells. *Nat Biotechnol* 29, 313–314.
- 604 Takahashi, K., and Yamanaka, S. (2006). Induction of pluripotent stem cells from mouse  
605 embryonic and adult fibroblast cultures by defined factors. *Cell* 126, 663–676.
- 606 Thomson, J.A., Itskovitz-Eldor, J., Shapiro, S.S., Waknitz, M.A., Swiergiel, J.J., Marshall, V.S.,  
607 and Jones, J.M. (1998). Embryonic stem cell lines derived from human blastocysts.  
608 *Science* 282, 1145–1147.
- 609 Weissbein, U., Benvenisty, N., and Ben-David, U. (2014). Quality control: Genome  
610 maintenance in pluripotent stem cells. *J. Cell Biol.* 204, 153–163.
- 611 Wood, K.W., Sakowicz, R., Goldstein, L.S., and Cleveland, D.W. (1997). CENP-E is a plus  
612 end-directed kinetochore motor required for metaphase chromosome alignment. *Cell*  
613 91, 357–366.
- 614 Zhang, M., Cheng, L., Jia, Y., Liu, G., Li, C., Song, S., Bradley, A., and Huang, Y. (2016).  
615 Aneuploid embryonic stem cells exhibit impaired differentiation and increased  
616 neoplastic potential. *EMBO J.* 35, 2285–2300.
- 617

Figure 1

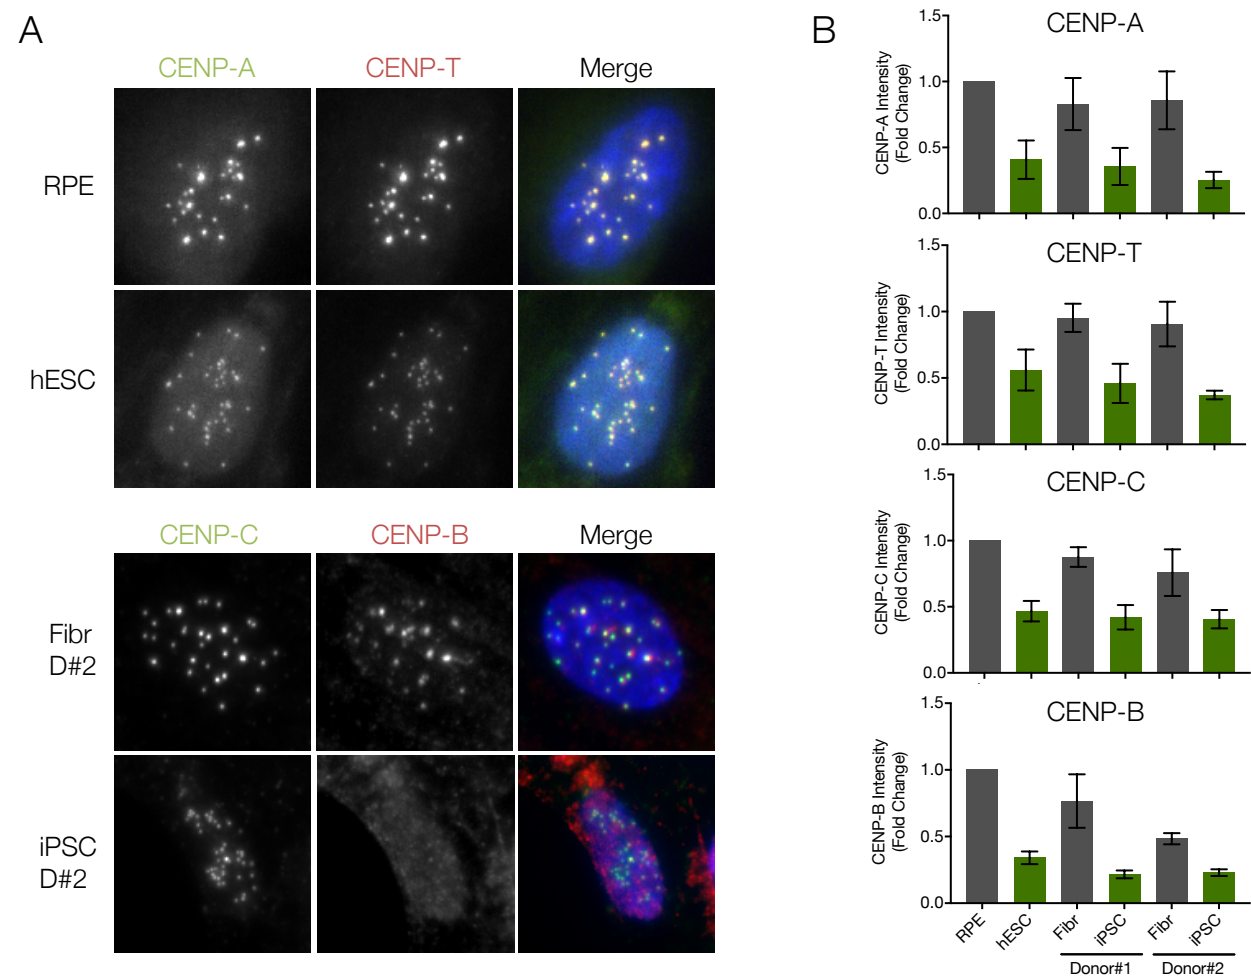

**Figure 1. Pluripotent stem cells have a weaker centromere than differentiated cells.** **A)** Differentiated (Retinal Pigment Epithelium – RPE and fibroblasts from two independent donors – Fibr D#1 and Fibr D#2) and pluripotent stem cells (human Embryonic Stem Cell line H9 – hESC or iPSC lines reprogrammed from fibroblasts from Donor #1 and Donor #2 – iPSC D#1 or iPSC D#2) were fixed and stained for CENP-A, CENP-T, CENP-C or CENP-B and counterstained with DAPI (blue). Representative immunofluorescence images from RPE and human embryonic stem cells (hESCs) are shown for CENP-A and CENP-T and representative images from Fibroblasts and iPSC from donor #2 are shown for CENP-B and CENP-C. **B)** Quantification of centromere intensities as shown in A) for all cell types. Average centromere intensities were determined using automatic centromere recognition and quantification (CRaQ; see methods). The average and standard error of the mean of three replicate experiments are shown. Centromere intensities are normalized to those of RPE cells.

Figure S1

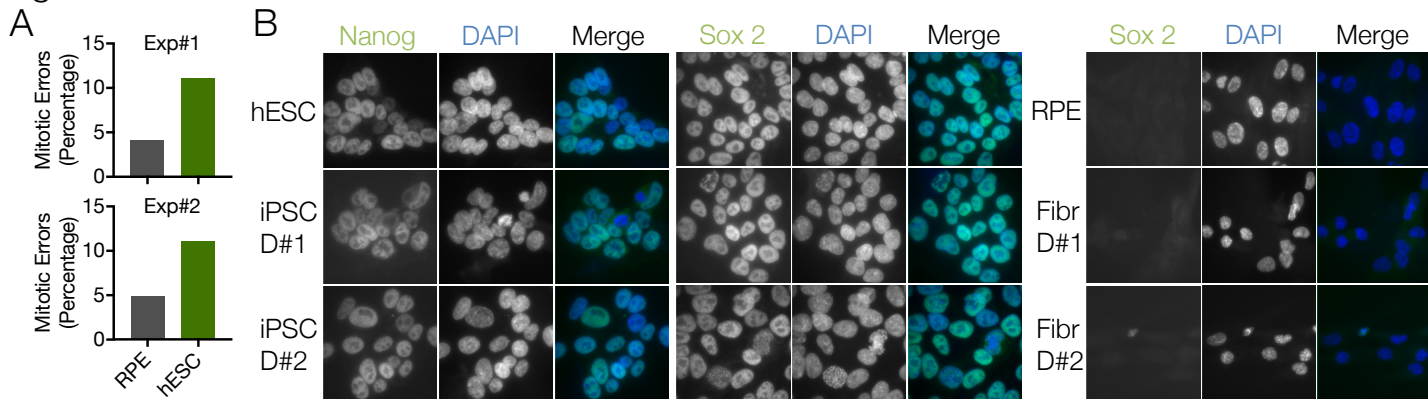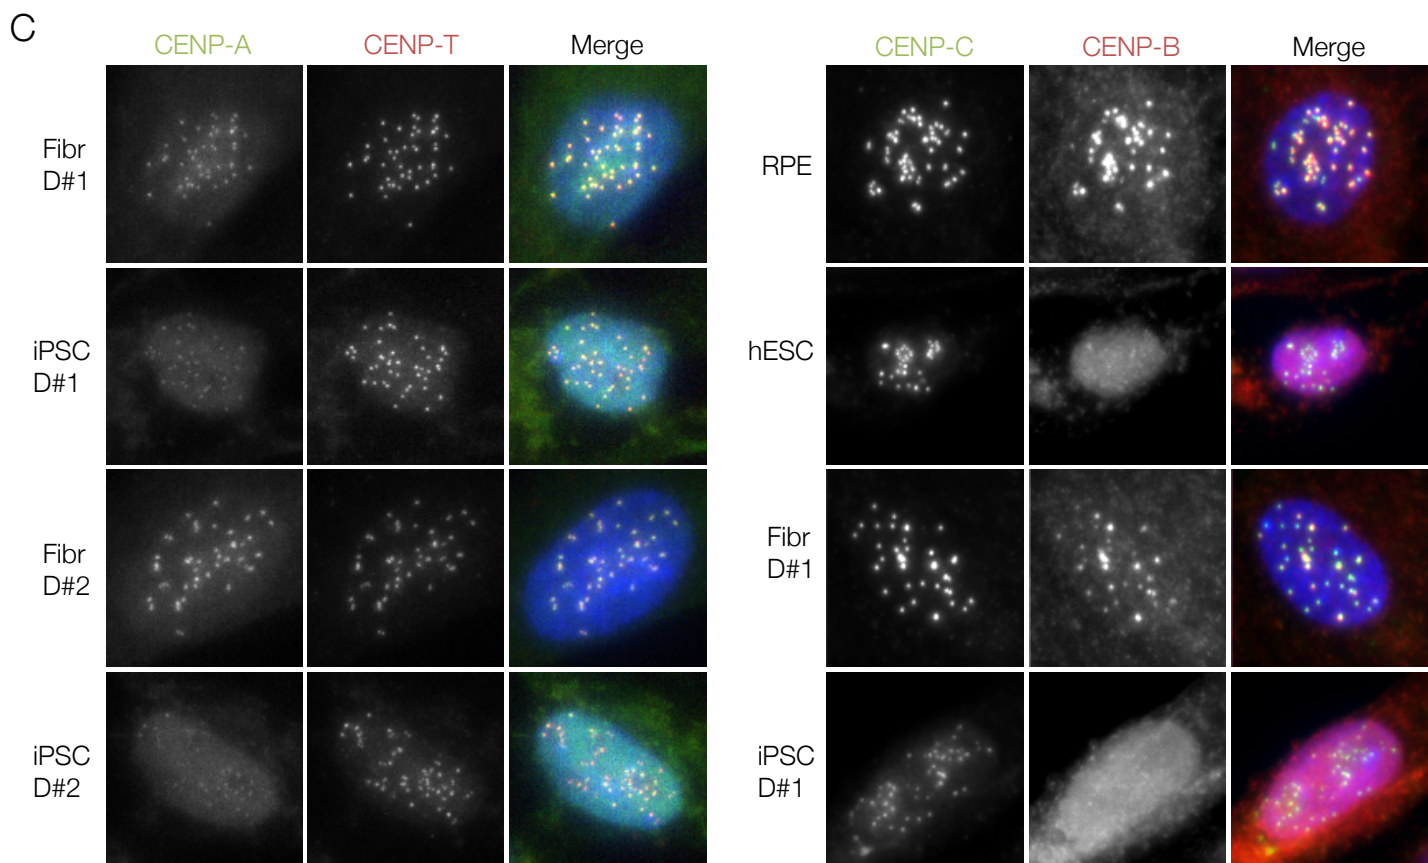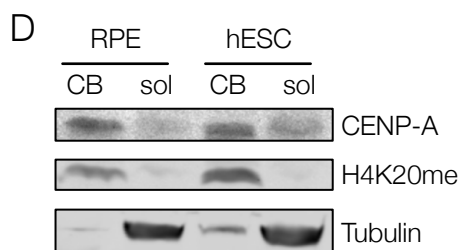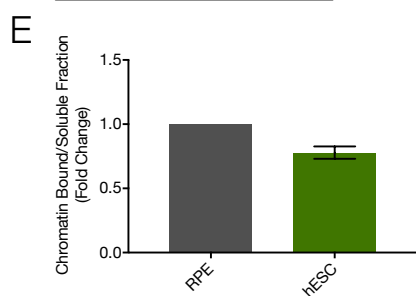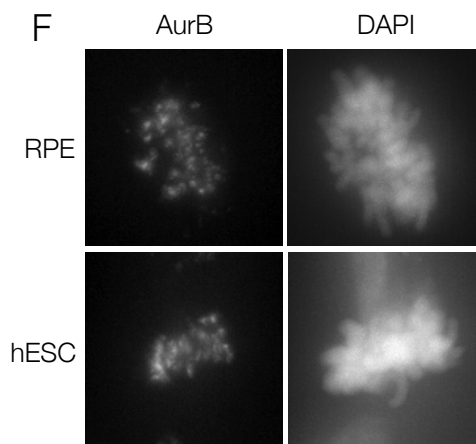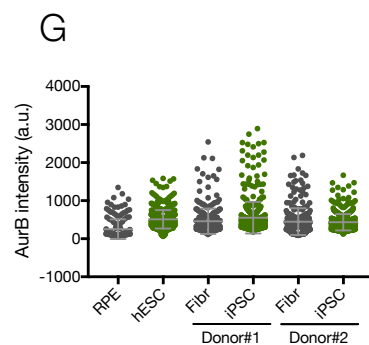

**Figure S1. Pluripotent stem cells have increased errors, a weaker centromere, but normal levels of AurB, when compared to differentiated cells.** **A)** Quantification of mitotic errors in RPE and hESC, from two independent experiments. Cells were fixed and the frequency of mitotic errors in unperturbed cells was evaluated. **B), C)** Differentiated (RPE and Fibr D#1 and Fibr D#2) and pluripotent stem cells (hESC or iPSC D#1 or iPSC D#2) were fixed and stained for either B) Nanog or Sox2 and counterstained with DAPI. Representative immunofluorescence images are shown, or C) CENP-A, CENP-T, CENP-C or CENP-B and counterstained with DAPI. Representative immunofluorescence images from Fibroblasts and iPSC from Donor #1 and Donor #2 are shown for CENP-A and CENP-T and representative images from RPE and hESC, Fibroblasts and iPSC from donor #1 are shown for CENP-B and CENP-C. **D) and E)** Cell fractionation experiments to assess total levels of soluble and chromatin bound CENP-A in RPE and hESC. Immunoblot probed for soluble (sol) and chromatin bound (CB) fractions of CENP-A in RPE and hESC. Tubulin is used as a marker for the soluble fraction and histone H4K20me2 for the CB fraction (D). Quantification of CENP-A ratio (chromatin bound/soluble fraction) from three independent experiments (E). **F)** Differentiated (RPE and Fibr D#1 and Fibr D#2) and pluripotent stem cells (hESC or iPSC D#1 or iPSC D#2) were fixed and stained for Aurora B (AurB) and counterstained with DAPI. **G)** Quantification of centromere intensities for AurB. Average centromere intensities were determined using automatic centromere recognition and quantification (CRaQ) for indicated cell types. Horizontal lines represent the mean for each sample.

Figure 2

A

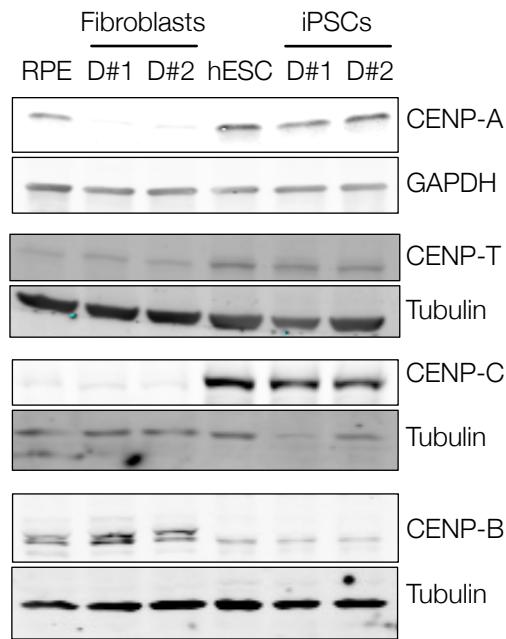

B

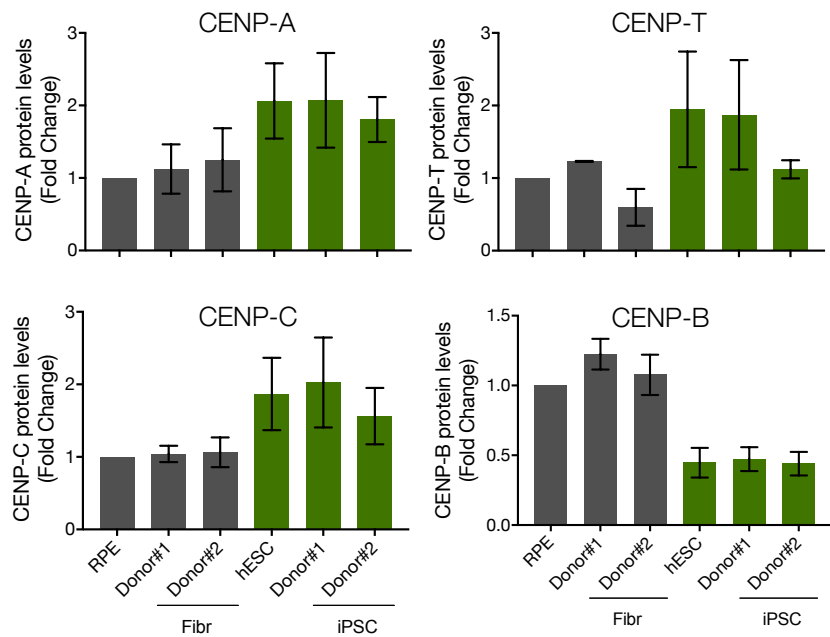

**Figure 2. Pluripotent stem cells have elevated expression of CENP-A and CENP-C, and decreased expression of CENP-B.** A) Human ESCs, RPE, iPSCs and the fibroblasts they were reprogrammed from, were harvested and processed for SDS-PAGE and immunoblotting. CENP-A, CENP-T, CENP-C and CENP-B levels were assessed with specific antibodies. GAPDH or Tubulin were used as loading controls. B) Quantitation of WB bands. The average and standard error of the mean of three replicate experiments are shown. Protein levels were normalised to GAPDH or tubulin.

Figure 3

A

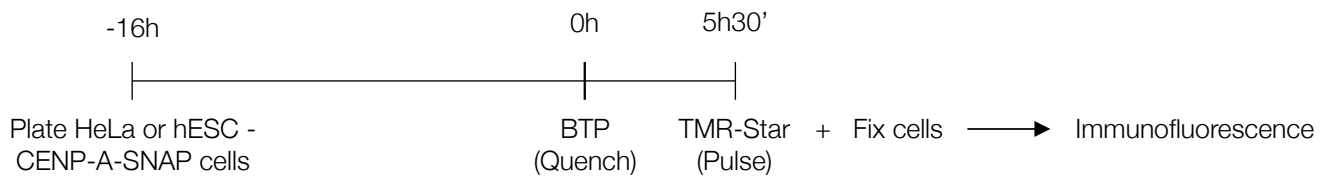

B

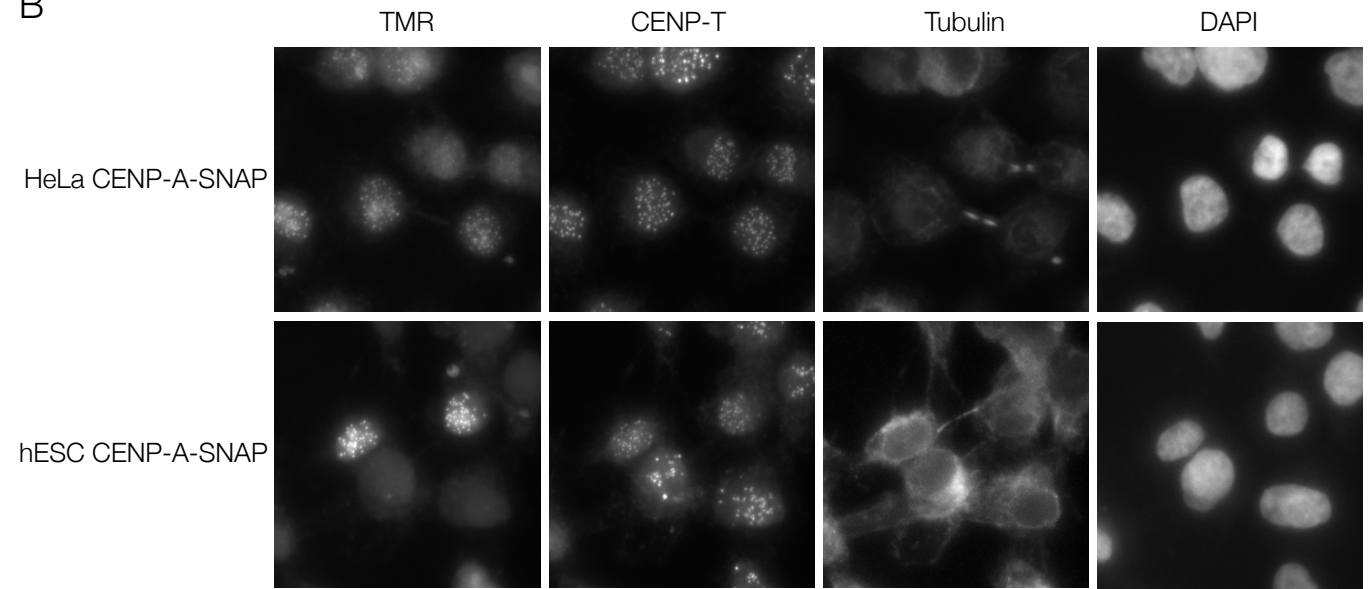

**Figure 3. CENP-A assembles in the canonical G1 phase of the pluripotent stem cell cycle.** **A)** SNAP-tag based quench-chase pulse labelling: CENP-A-SNAP expressing hESC or HeLa cells were labelled with the non-fluorescent substrate (BTP; quench) followed by a chase period (5h30min) during which new unlabelled protein is synthesised. Nascent protein is subsequently fluorescently labelled with TMR-Star (Pulse). Localization and fate of nascent fluorescently labelled CENP-A-SNAP is determined by high-resolution microscopy. **B)** Representative fluorescence images of differentiated (HeLa CENP-A-SNAP) cells or hESC (hESC CENP-A-SNAP) cells as processed according to A). Tubulin staining was used to identify midbodies, indicative of G1 phase cells. CENP-A-SNAP assembly occurs in a subset of cells and all midbody positive cells are positive for nascent CENP-A assembly.



Figure 4

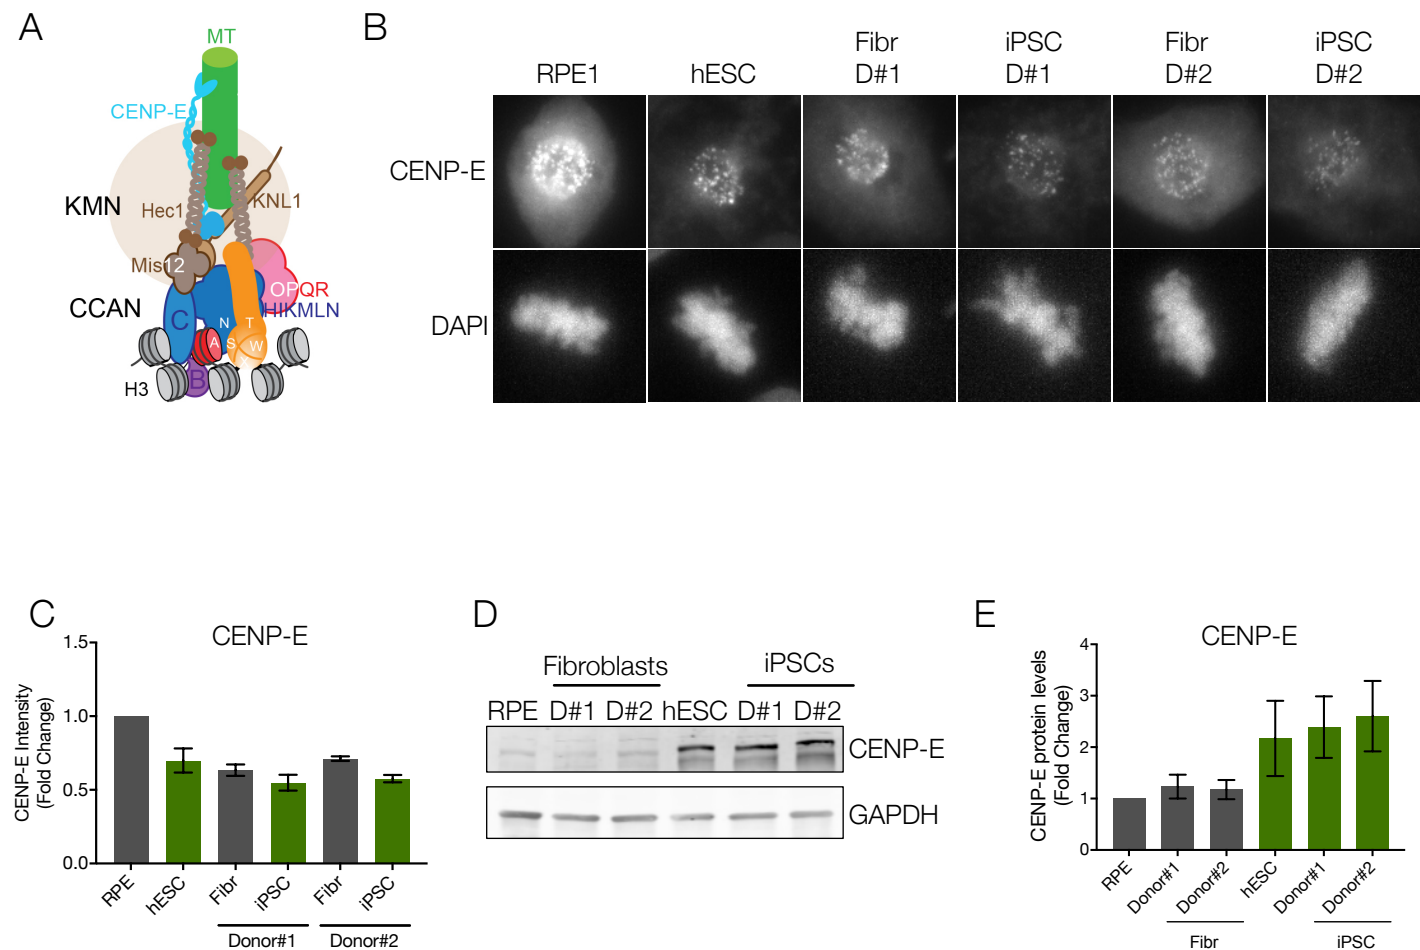

**Figure 4. Reduced outer kinetochore size of PSCs in mitosis.** **A)** Scheme representing the architecture and interactions of different proteins that comprise the human centromere and kinetochore. **B)** Representative immunofluorescence images from differentiated (RPE and Fibroblasts derived from Donor#1 and Donor#2 – Fibr D#1 and Fibr D#2) and pluripotent stem cells (human Embryonic Stem Cell line H9 - hESC and iPSCs reprogrammed from Fibr D#1 and Fibr D#2 - iPSC D#1 and iPSC D#2) for CENP-E. **B)** Quantitation of centromeric CENP-E. Mean levels of fluorescence per nuclei was measured. The average and standard error of the mean of three independent experiments are shown. **C)** Human ESCs, RPE, iPSCs and the fibroblasts they were reprogrammed from, were harvested and processed for SDS-PAGE and immunoblotting. CENP-E levels were assessed with a specific antibody. GAPDH was used as a loading control. **D)** Quantitation of WB bands. Average and standard error of the mean of three independent experiments are shown. Protein levels were normalised to GAPDH.



Figure S4

A

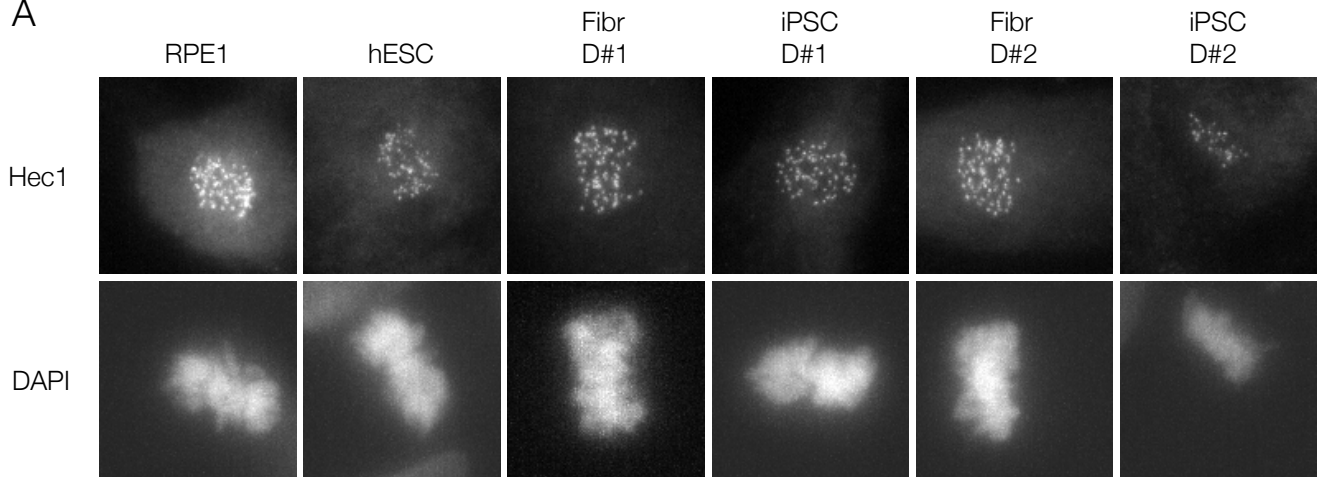

B

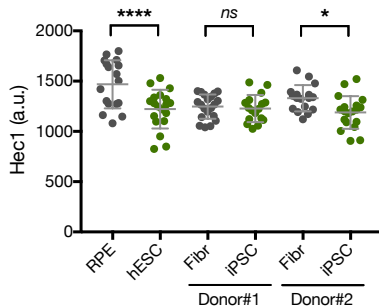

C

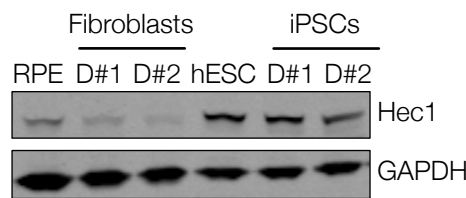

D

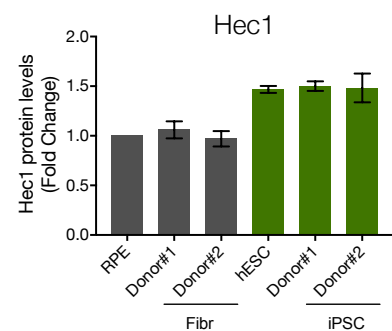

**Figure S4. Reduced Hec1 at the kinetochore of PSCs in mitosis.** **A)** Representative immunofluorescence images from differentiated (RPE and Fibroblasts derived from Donor#1 and Donor#2 – Fibr D#1 and Fibr D#2) and pluripotent stem cells (human Embryonic Stem Cell line H9 - hESC and iPSCs reprogrammed from Fibr D#1 and Fibr D#2 - iPSC D#1 and iPSC D#2) for Hec1. **B)** Quantitation of centromeric Hec1. Mean levels of fluorescence per nuclei was measured. Horizontal lines represent the mean, whiskers represent standard deviation, for each sample. **C)** Human ESCs, RPE, iPSCs and the fibroblasts they were reprogrammed from, were harvested and processed for SDS-PAGE and blotted for Hec1 levels. GAPDH was used as a loading control. **D)** Quantitation of WB bands. Average and standard error of the mean of three independent experiments are plotted. Protein levels were normalised to GAPDH.

**Figure 5****A**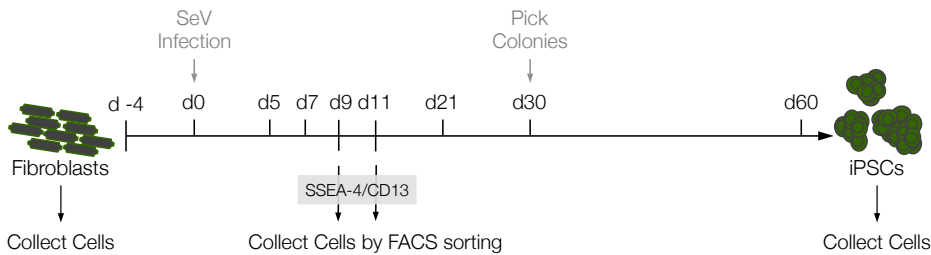**B**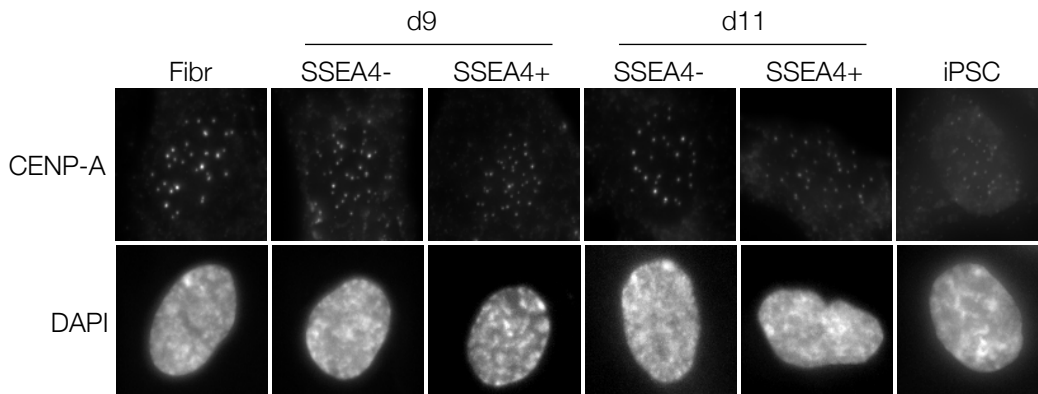**C**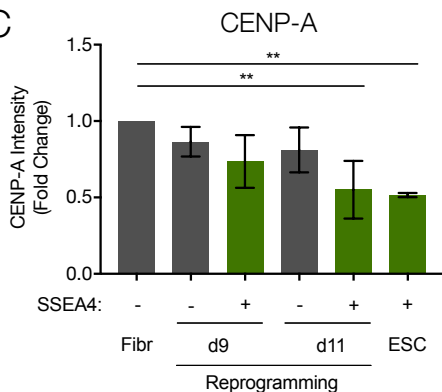

**Figure 5. CENP-A loss is induced during early reprogramming of fibroblasts to iPSCs.** **A)** Outline of the general strategy to reprogram iPSCs from fibroblasts: Human primary fibroblasts are reprogrammed by infection with Sendai Virus (SeV) expressing Oct4, Sox2, Klf4 and c-Myc. At days 9 and 11 after infection (d9 and d11, respectively), cells are incubated with antibodies specific for SSEA-4 (early pluripotency marker) and CD13 (fibroblast marker) and collected by FACS sorting. Thirty days after infection, visible colonies appear and can be picked under the microscope. Single colonies are picked, expanded and kept in culture. The cells collected at day 9 and 11, the initial fibroblast population and fully reprogrammed iPSCs (reprogrammed from those fibroblasts), were stained for CENP-A and counterstained with DAPI. **B)** Representative immunofluorescence images from cells collected by FACS at d9 and d11 and sorted by pluripotency profile (SSEA4 Negative and CD13 Positive – Refractory to reprogramming - vs SSEA4 positive and CD13 negative cells – Prone to reprogram) and control cells. **C)** Quantification of centromere intensities as shown in B). Average centromere intensities were determined using automatic centromere recognition and quantification (CRaQ; see methods) for indicated cell types. The average and standard error of the mean of three replicate experiments is shown for indicated cell types. Centromere intensities are normalized to those of fibroblasts.

A

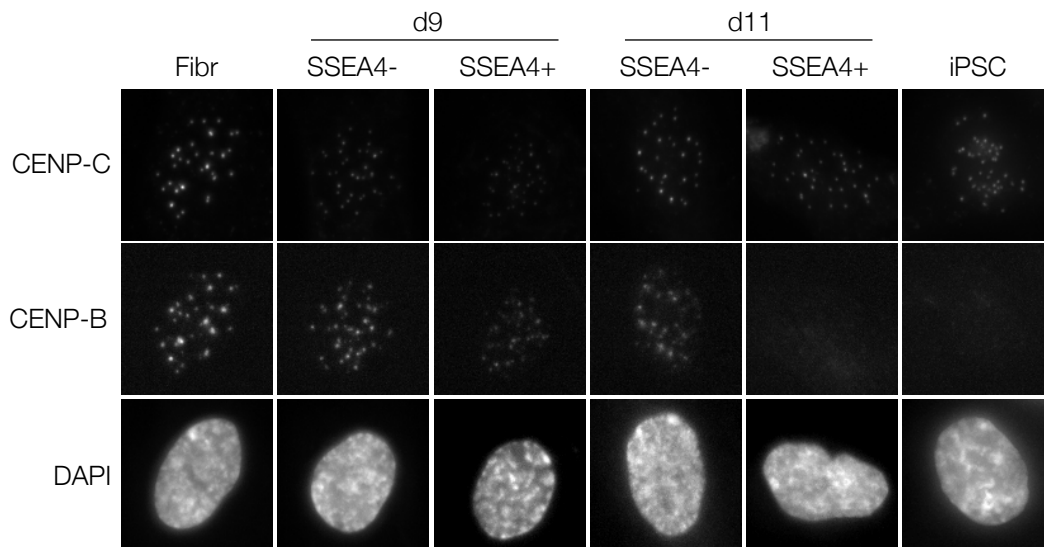

B

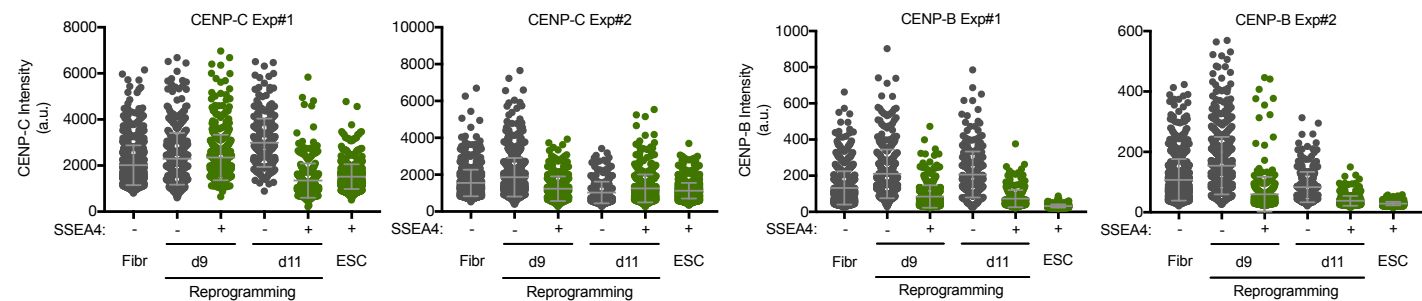

**Figure S5. CENP-B and CENP-C are reduced during early reprogramming of fibroblasts to iPSCs.** **A)** Experiment as in Figure 5. Representative immunofluorescence images from cells collected by FACS at d9 and d11 and sorted by pluripotency profile as in Figure 5, stained with CENP-C and CENP-B and counterstained with DAPI. **B)** Quantification of centromere intensities as shown in A). Average centromere intensities were determined using automatic centromere recognition and quantification (CRaQ) for indicated cell types. Horizontal lines represent the mean, whiskers represent standard deviation, for each sample.
